# Supplementary material
Source: Springer Nature journal article supplement (https://www.springermedizin.de/resource/supplementary/12879_2012_2009_MOESM3_ESM.pdf/9443514)

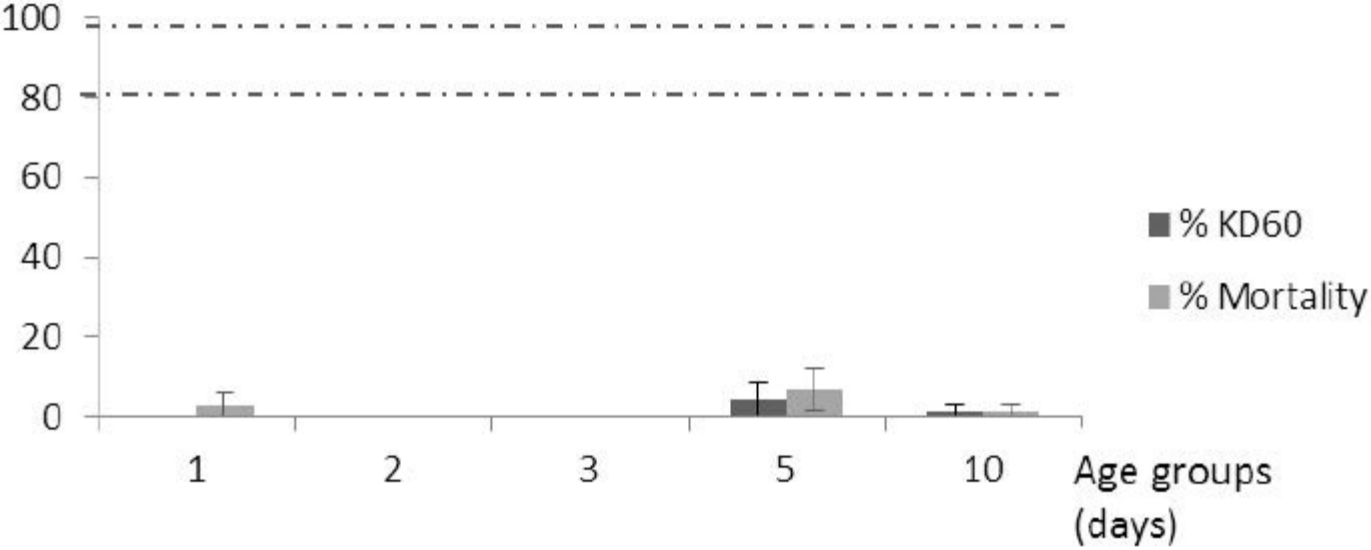

Supplement: MOESM3 [file 9443514]
